# Supplementary material
Source: publisher figshare collection journal article supplement (https://acs.figshare.com/ndownloader/files/4793554)
Supplement: Supplementary file 1 [file 4793554]

| Estrogen  | Correlation Coefficient ( $R^2$ ) | Recovery $\pm$ R.S.D (%) |               | LOQ   |
|-----------|-----------------------------------|--------------------------|---------------|-------|
|           |                                   | 250ng/L                  | 10ng/L        |       |
| Estrone   | 0.997                             | 110 $\pm$ 2.5            | 102 $\pm$ 5.1 | 0.63  |
| Estradiol | 0.998                             | 107 $\pm$ 3.2            | 99 $\pm$ 2.2  | 1.884 |
| Estriol   | 0.994                             | 77 $\pm$ 4.0             | 76 $\pm$ 5.2  | 0.964 |

Limit of quantification (LOQ) ( $10 \times$  S.D. y-intercept / m) were determined using the calibration curve of the analyte peaks.
